# Supplementary material for: The rs13388259 Intergenic Polymorphism in the Genomic Context of theBCYRN1Gene Is Associated with Parkinson’s Disease in the Hungarian Population
Source: Hindawi journal article supplement (doi:10.1155/2018/9351598), 2018-01-01
Supplement: f1 [file 9351598.f1.pdf]

**Supplementary Table 1.** Allele distribution of the 14 investigated polymorphisms in PD patients (n=101) and controls (n=83).

| LncRNA          | SNP               | PD patients (n=101)  |                 | Controls (n=83)      |                 | Statistical analysis |                         |                               |
|-----------------|-------------------|----------------------|-----------------|----------------------|-----------------|----------------------|-------------------------|-------------------------------|
|                 |                   | Wild type allele (n) | Rare allele (n) | Wild type allele (n) | Rare allele (n) | Odds ratio           | 95% Confidence interval | Fisher exact probability test |
| <i>PINK1-AS</i> | rs542589          | 181                  | 21              | 147                  | 19              | 1.11                 | 0.6–2.2                 | p=0.4373                      |
|                 | rs1043424         | 156                  | 46              | 133                  | 33              | 1.19                 | 0.7–2.0                 | p=0.2935                      |
|                 | rs540038          | 182                  | 20              | 146                  | 20              | 1.25                 | 0.6–2.4                 | p=0.3110                      |
| <i>HAR1A</i>    | rs6089838         | 107                  | 95              | 88                   | 78              | 1.01                 | 0.6–1.5                 | p=0.5387                      |
|                 | rs750697          | 153                  | 49              | 117                  | 49              | 1.31                 | 0.8–2.1                 | p=0.1544                      |
| <i>ANRIL</i>    | rs10738605        | 126                  | 76              | 106                  | 60              | 1.07                 | 0.7–1.6                 | p=0.4274                      |
|                 | rs564398          | 119                  | 83              | 92                   | 74              | 1.15                 | 0.8–1.7                 | p=0.2851                      |
| <i>BC200</i>    | rs10865224        | 119                  | 83              | 97                   | 69              | 1.02                 | 0.7–1.5                 | p=0.5053                      |
|                 | <b>rs13388259</b> | <b>165</b>           | <b>37</b>       | <b>158</b>           | <b>8</b>        | <b>4.43</b>          | <b>2.0–9.8</b>          | <b>p=0.00004</b>              |
| <i>SOX2-OT</i>  | rs13096623        | 183                  | 19              | 150                  | 16              | 1.03                 | 0.5–2.1                 | p=0.5390                      |
|                 | <b>rs6765739</b>  | <b>107</b>           | <b>95</b>       | <b>101</b>           | <b>65</b>       | <b>1.38</b>          | <b>0.9–2.1</b>          | <b>p=0.0791</b>               |
| <i>UCHL1</i>    | <b>rs12649180</b> | <b>183</b>           | <b>19</b>       | <b>142</b>           | <b>24</b>       | <b>1.63</b>          | <b>0.9–3.0</b>          | <b>p=0.0907</b>               |
|                 | rs17443616        | 144                  | 58              | 126                  | 40              | 1.27                 | 0.8v2.0                 | p=0.1899                      |
|                 | rs2342526         | 129                  | 73              | 114                  | 52              | 1.24                 | 0.8–1.9                 | p=0.1951                      |
